# Supplementary material for: Simultaneous analysis of depurinated nucleic acid stem-loop and free adenine for ricin toxicity assay by hydrophilic interaction liquid chromatography-high-resolution mass spectrometry (HILIC-HRMS)
Source: Royal Society of Chemistry journal article supplement (doi:10.1039/d4ay01203h), 2024-01-01
Supplement: d4ay01203h1.pdf [file d4ay01203h1.pdf]

Electronic Supplementary Information

**Simultaneous analysis of depurinated nucleic acid stem-loop and free adenine for ricin toxicity assay by hydrophilic interaction liquid chromatography–high-resolution mass spectrometry (HILIC-HRMS)**

Hajime Miyaguchi

National Research Institute of Police Science

6-3-1 Kashiwanoha, Kashiwa, Chiba 277-0882 Japan

E-mail: miyaguchi@nrps.go.jp

**Table of Contents**

Fig. S1. Optimization of the column oven temperature and the injection volume for 14 mer RNA stem-loop.

.....S2

Fig. S2. Optimization of the column oven temperature and the injection volume for 12 mer RNA/DNA chimera stem-loop.

.....S4

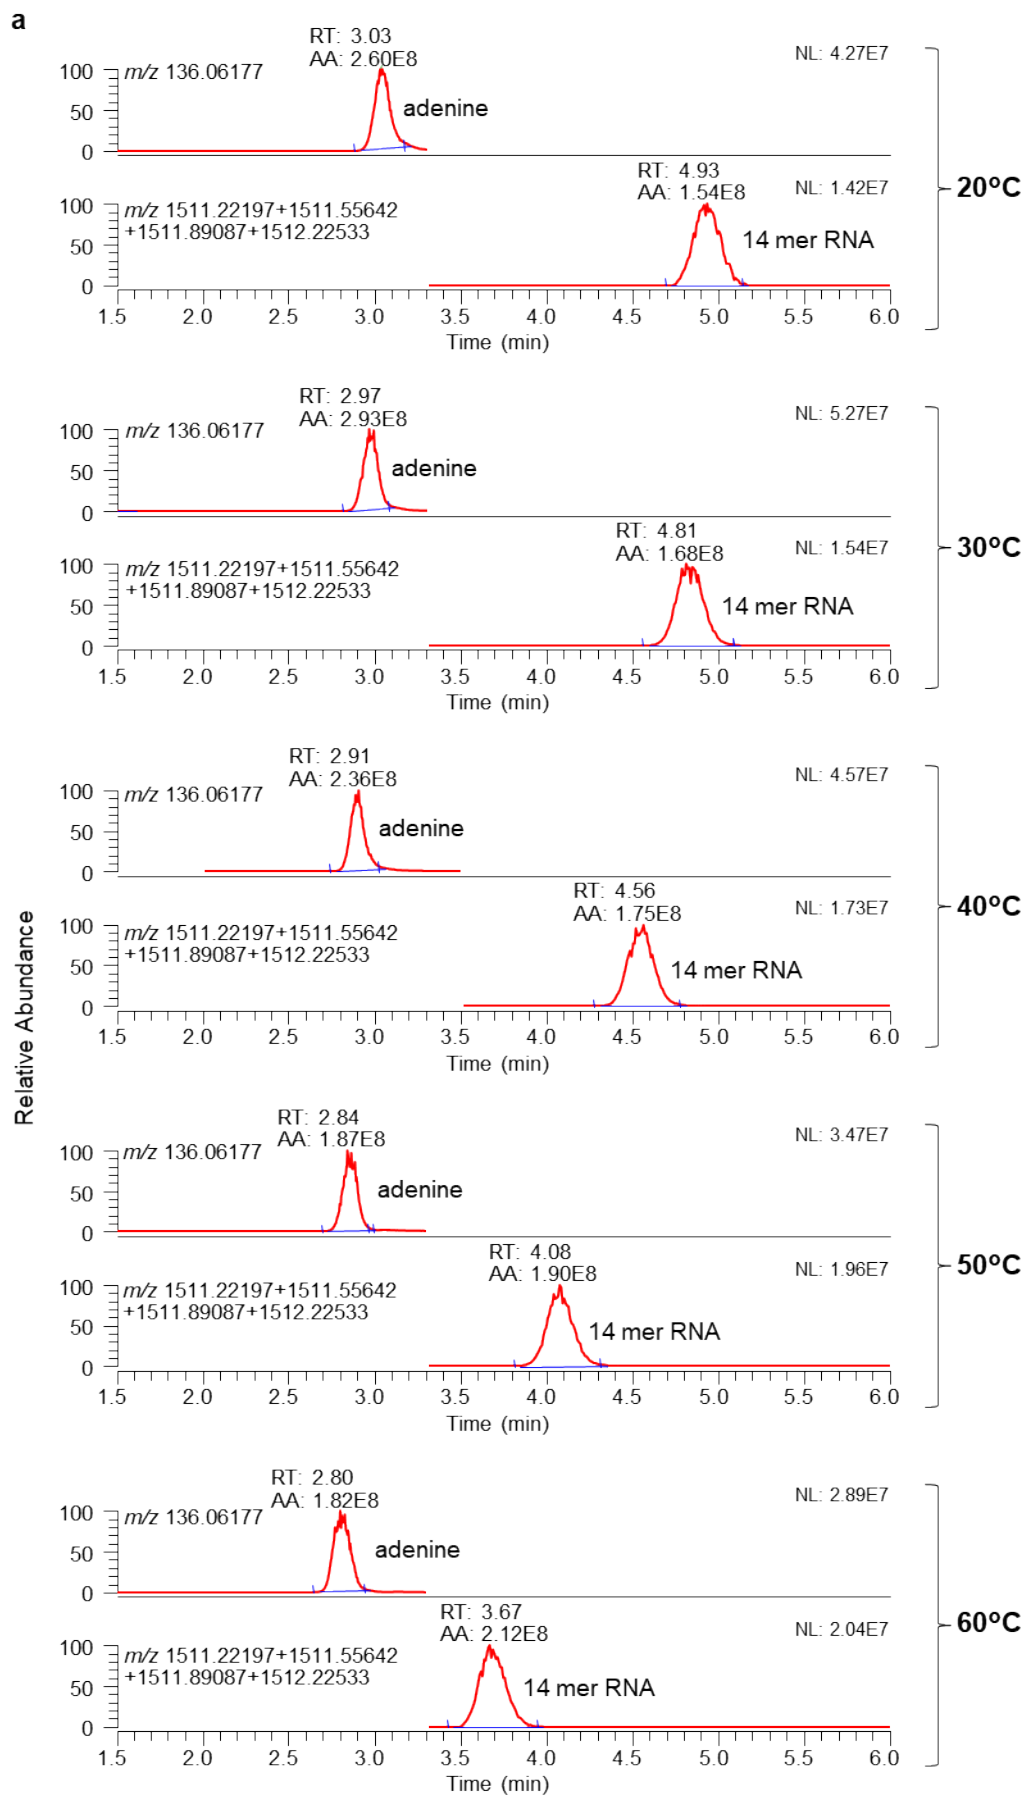

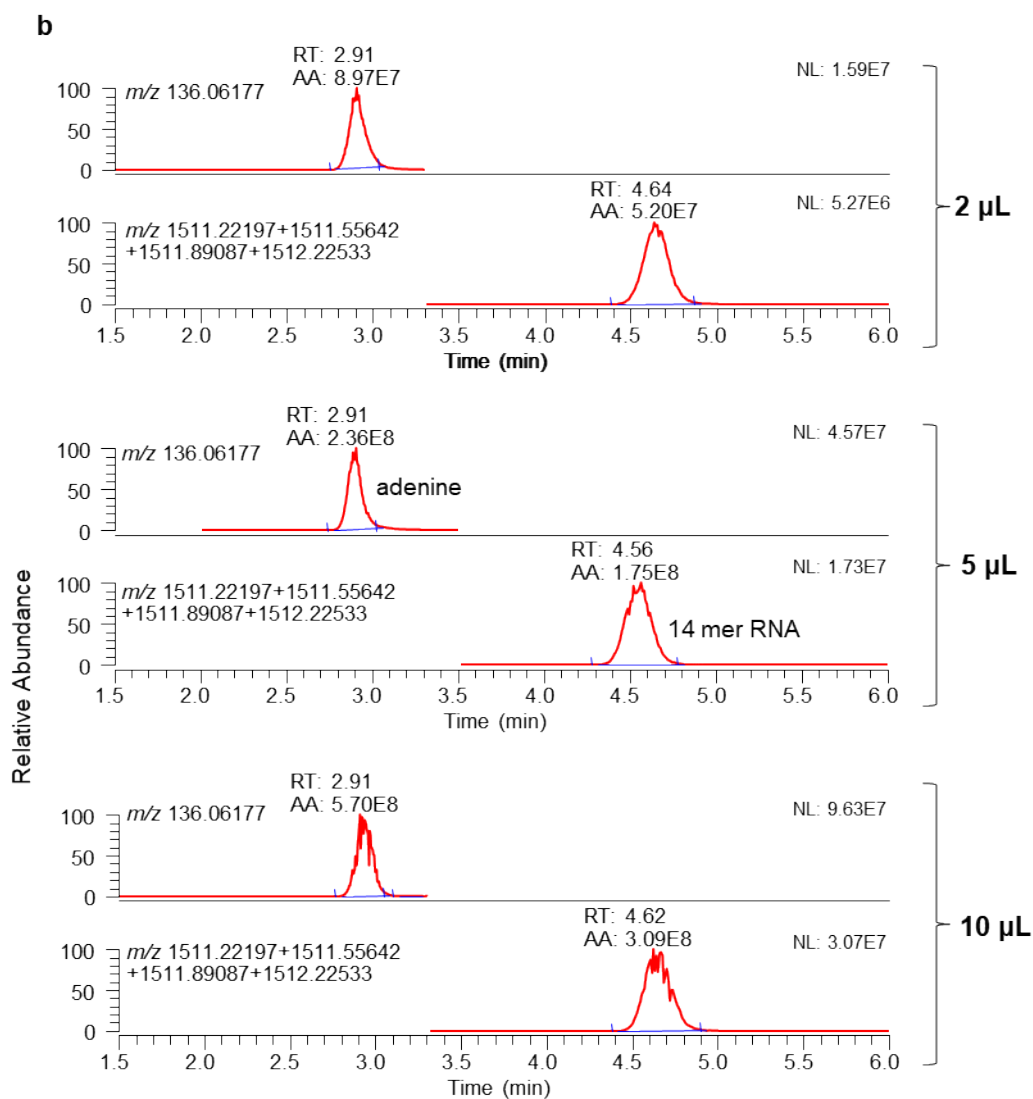

Fig. S1. (a) Optimization of the column oven temperature for adenine and the 14 mer RNA stem-loop. The injection volume was 5 µL. (b) Optimization of the injection volume. The column temperature is 40°C. Mass tolerance: ± 5 ppm.

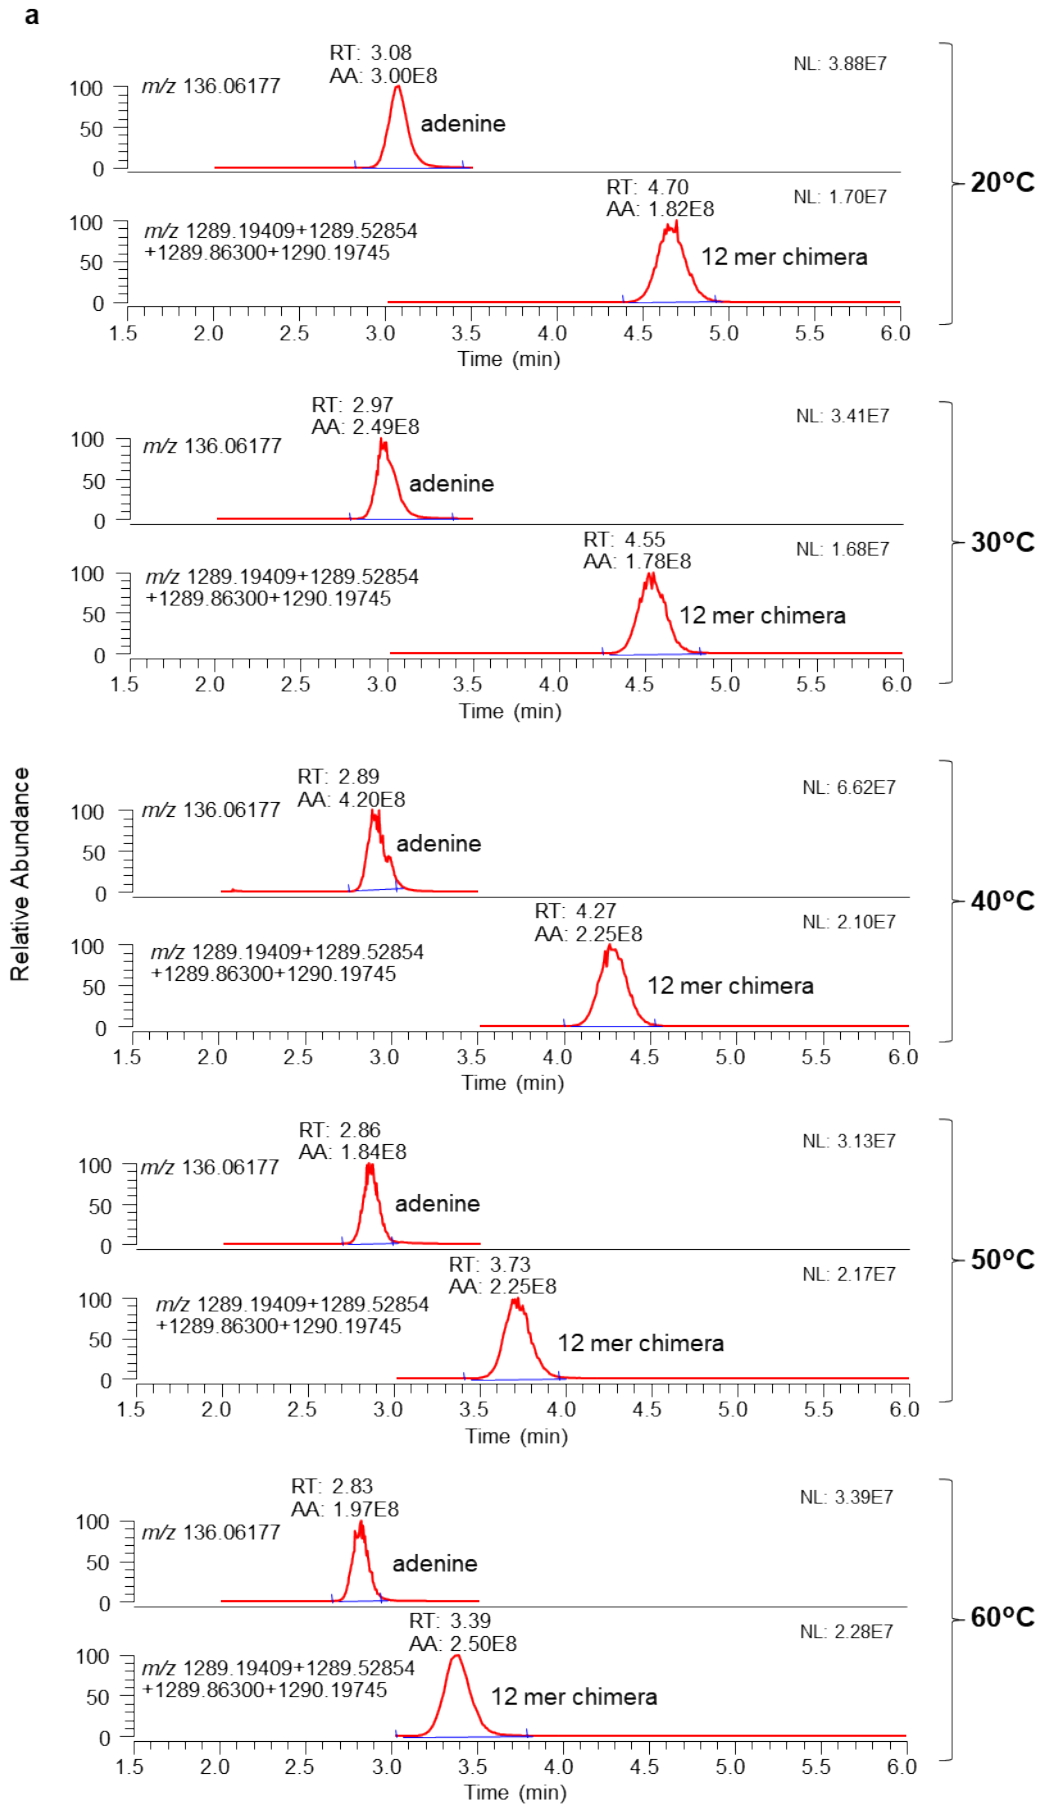

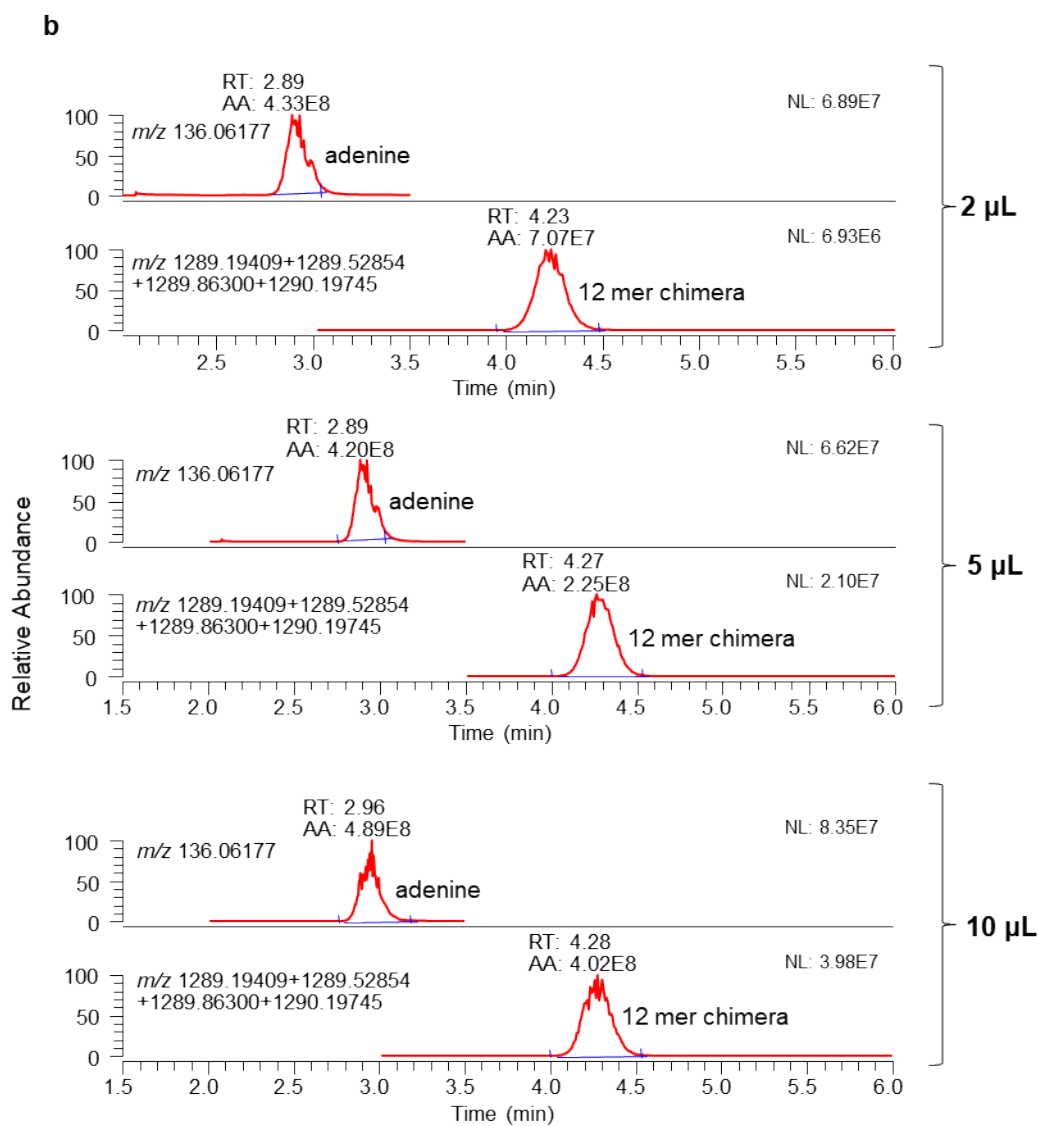

Fig. S2. (a) Optimization of the column oven temperature for adenine and the 12 mer RNA/DNA chimera stem-loop. The injection volume was 5 µL. (b) Optimization of the injection volume. The column temperature is 40°C. Mass tolerance:  $\pm 5$  ppm.
